1 **Production of novel biosurfactant by a new yeast species isolated**  
2 **from *Prunus mume* Sieb. et Zucc.**

3

4 **Jeong-Seon Kim<sup>1,2</sup>, Miran Lee<sup>1</sup>, Dae-Won Ki<sup>2</sup>, Soon-Wo Kwon<sup>1</sup>, Young-Joon Ko<sup>1</sup>, Jong-**  
5 **Shik Kim<sup>3</sup>, Bong-Sik Yun<sup>2\*</sup>, Soo-Jin Kim<sup>1\*</sup>**

6 *<sup>1</sup>Agricultural Microbiology Division. National Institute of Agricultural Science, Rural*  
7 *Development Administration, Wanju-gun, Jeollabuk-do, Republic of Korea.*

8 *<sup>2</sup>Division of Biotechnology and Advanced institute of Environmental and Bioscience, College*  
9 *of Environmental and Bioresource Sciences, Jeonbuk National University, 79 Gobong-ro,*  
10 *Iksan-si, Jeollabuk-do, Republic of Korea.*

11 *<sup>3</sup>Marine industry research institute for east sea rim, 22 Haeyanggwahak-gil, Uljin-gun,*  
12 *Geongsangbuk-do, Republic of Korea.*

13

14 \*Corresponding authors

15 **Bong-Sik Yun (BSY)**

16 Tel: 82-63-6404-4339, Fax: 82-63-850-0834

17 E-mail: [bsyun@jbnu.ac.kr](mailto:bsyun@jbnu.ac.kr)

18

19 **Soo-Jin Kim (SJK)**

20 Tel: 063-238-3031, Fax: 063-238-3811

21 E-mail: [sinhye@korea.kr](mailto:sinhye@korea.kr)

22

## 23 Abstract

24 Biosurfactants reduce surface and interfacial tension due to their amphiphilic properties,  
25 and are an eco-friendly alternative for chemical surfactants. In this study, a novel yeast strain  
26 JAF-11 that produces biosurfactant was selected using drop collapse method, and the properties  
27 of the material were investigated. The nucleotide sequences of the strain were compared with  
28 closely related strains and identified based on the D1/D2 domain of the large-subunit rDNA  
29 (LSU) and internal transcribed spacer (ITS) regions. *Neodothiora populina* CPC 39399<sup>T</sup>, the  
30 closest species with strain JAF-11 in the phylogenetic tree, showed a sequence similarity of  
31 97.75% for LSU and 94.27% for ITS, respectively. The result suggests that the strain JAF-11  
32 represent a distinct species which cannot be assigned to any existing genus or species in the  
33 family *Dothideaceae*. Strain JAF-11 was able to produce biosurfactant reducing the surface  
34 tension of medium to 34.5 mN/m on the 6<sup>th</sup> day of culture and the result of measuring the  
35 critical micelle concentration (CMC) by extracting the crude biosurfactant was found to be 24  
36 mg l<sup>-1</sup>. The molecular weight 502 of the purified biosurfactant was confirmed by measuring  
37 the fast atom bombardment mass spectrum (FAB-MS). The chemical structure was analyzed  
38 by measuring <sup>1</sup>H nuclear magnetic resonance (NMR), <sup>13</sup>C NMR, two-dimensional NMRs of  
39 the compound. The molecular formula was C<sub>26</sub>H<sub>46</sub>O<sub>9</sub>, and it was composed of one octanoyl  
40 group and two hexanoyl group to myo-inositol moiety. The new biosurfactant is the first report  
41 of a compound produced by a novel yeast strain JAF-11. This new biosurfactant is proposed  
42 as potential candidate for use in a variety field.

43

44

45 **KEYWORDS:** Yeast, novel species, novel biosurfactant, chemical structure

46

## 47 **Introduction**

48

49           The surfactants have amphiphilic properties possessing both non-polar (hydrophobic)  
50 and polar (hydrophilic) moieties that allows reducing the surface and interfacial tension  
51 between biphasic systems as liquid-liquid interface or solid-liquid boundaries [1, 2]. The  
52 surfactants are one of the important compounds having potential commercial application of  
53 detergents, cosmetics, food ingredients, agricultural, pharmaceutical, paint, textile and paper  
54 etc. [3, 4]. However, surfactants are mainly chemically synthesized from petroleum-based  
55 resources, which can cause environmental problems due to toxicity [5]. As environmental  
56 awareness has gradually increased over the past decades, the demand for eco-friendly  
57 compounds has increased, and accordingly, there is an increasing interest in microbial  
58 biosurfactants [6]. In particular, microbe-derived biosurfactants have advantages such as  
59 environmental compatibility, activity, stability, and lower toxicity compared to chemically  
60 synthesized equivalents [7-11].

61           Biosurfactants are classified according to ionic charges (anionic, cationic, non-ionic  
62 and neutral biosurfactants), molecular weight (high molecular and low molecular weight  
63 biosurfactants), secretion type (intracellular, extracellular and adhered to microbial cells), and  
64 chemical structure (glycolipids, lipopeptides, fatty acids, phospholipids, neutral lipids and  
65 polymeric biosurfactants), and it has also been previously reported that various biosurfactants  
66 are produced depending on the type of microorganisms [12]. Among them, glycolipids have  
67 been best known as a class of biosurfactants that exhibit the highest commercial potential due  
68 to the high microbial productivity [13]. The microbe-derived biosurfactant rhamnolipids, also  
69 known as glycolipids, was described for the first time in 1946 [14]. Despite their high  
70 productivity, most of them is produced by opportunistic pathogen *Pseudomonas aeruginosa*  
71 [15]. The sophorolipids belonging to the group of glycolipid are one of the most promising

72 biosurfactant because they are produced by non-pathogen yeast *Starmerella bombicola* and  
73 other *Candida* spp. (*Candida stellate*, *C. riodecensis*, *C. apicola*, *C. batistae*, *C. kuoi*, and *C.*  
74 *floricola*) [16, 17]. Mannosylerythritol lipids (MEL) by a variety of *Pseudozyma* yeasts and  
75 trehalolipids by *Rhodococcus erythopolis* have been reported as representative biosurfactants  
76 belonging to the glycolipid [18]. It has been reported that microorganisms such as the genera  
77 *Acinetobacter*, *Arthrobacter*, *Pseudomonas*, *Halomonas*, *Bacillus*, *Rhodococcus*, *Enterobacter*,  
78 and few yeast genera produce not only glycolipids but also other types of biosurfactants [19].

79 In the 20<sup>th</sup> century, research on biosurfactants focused on understanding and  
80 optimizing the production process, and since then, research on utilizing various renewable  
81 resources, discovering new producer strains, or developing genetically modified strains has  
82 been reported [6]. Since biosurfactants have a wide range of functional properties depending  
83 on their chemical structure [19], it is necessary to continuously secure a variety of  
84 biosurfactants in order to be applied to various fields. The present study is the first report of  
85 novel biosurfactant extracted from the novel yeast strain JAF-11. We isolated a new species of  
86 yeast that produces biosurfactant from flower in order to secure various biosurfactants, and  
87 chemical structure of the biosurfactant extracted from the yeast has been characterized and  
88 identified as a novel biosurfactant by nuclear magnetic resonance spectrometry techniques.

89

## 90 **Materials and methods**

91

### 92 **Culture medium for biosurfactant production by yeast**

93 The culture medium composition used in these studies for biosurfactant-producing  
94 yeast was as follows (w/v): glucose (1.5%), soybean oil (1.5%), ammonium sulfate (0.1%),  
95 potassium phosphate (0.25%), sodium phosphate (0.01%), magnesium sulfate (0.05%),

96 calcium chloride (0.01%), manganese sulfate (0.002%) and peptone (0.1%).

97

## 98 **Isolation and screening of biosurfactant producing yeast**

99 The biosurfactant-producing yeast used in this study was isolated from flower (*Prunus*  
100 *mume* Sieb. *et* Zucc.) collected from apricot village in Gwangyang, Republic of Korea during  
101 March 2018. The biosurfactant was screened using modified drop collapse method as follows:  
102 100µL of the culture supernatant and water (1:1, v/v) was pipetted and placed on parafilm [20,  
103 21]. The selected strain JAF-11 was maintained for storage at -80°C in 15% (v/v) glycerol, and  
104 was deposited with the patent depository as KACC 83047BP.

105

## 106 **Identification of biosurfactant producing yeast**

107 The identification of strain JAF-11 was conducted based on multigene phylogenetic  
108 analysis of the nucleotide sequences combined with the D1/D2 region of large-subunit (LSU)  
109 and the internal transcribed spacer (ITS) region ribosomal DNA (rDNA) genes. The DNA  
110 sequencing was performed by Macrogen Inc. (Seoul, Korea) and the gene sequences of related  
111 species were retrieved from GenBank database. The phylogenetic tree was inferred by using  
112 the maximum likelihood method with 1,000 bootstrap replicates and sequences analysis was  
113 performed in MEGA X software.

114

## 115 **Time course of the growth and determination of surface tension**

116 The strain JAF-11 was grown in 500 ml culture medium at 25°C on a rotary shaker at  
117 150 rpm, and then the optical density at 600 nm was measured for 8 days by a UV  
118 spectrophotometer. To confirm the production of biosurfactant, the culture medium of strain

119 JAF-11 was prepared through a 0.22  $\mu\text{m}$  filter and measured the surface tension(ST) every  
120 day. For ST measurement, the Wilhelmy plate method was used at room temperature with a  
121 force tensiometer K11 (Krüss, Germany). All tests were performed in triplicates.

122

## 123 **Measurement of critical micelle concentration (CMC) of** 124 **biosurfactant**

125 To extract the crude biosurfactant, 8 L culture medium inoculated with freshly grown  
126 strain JAF-11 was mixed with HP-20 non-polar resin (Mitsubishi chemical, Japan) and eluted  
127 in methanol. After removing methanol by rotary vacuum evaporation, the concentrated solution  
128 was partitioned with an equal volume of ethyl acetate. The ethyl acetate was concentrated under  
129 vacuum evaporator, and the product was used for CMC measurement after purification using  
130 Flash silica gel column chromatography ( $\text{CHCl}_3$ :MeOH, 50:1 to 1:1, v/v, stepwise) (SK  
131 chemical, Korea). The crude biosurfactant were dissolved in distilled water and serially diluted  
132 to concentrations in the range of 0-250  $\text{mg l}^{-1}$ . The CMC was determined by plotting the surface  
133 tension against the log of the biosurfactant concentration using a force tensiometer K11 (Krüss,  
134 Germany) [22].

135

## 136 **Isolation and purification of biosurfactant compound**

137 A yeast strain of JAF-11 was cultured in a medium described above for 5 days at 25°C  
138 on a rotary shaker incubator at 150 rpm. The culture broth was subjected to Diaion HP-20  
139 column chromatography and eluted with 30% aq. MeOH, 70% aq. MeOH, MeOH, and acetone.  
140 The biosurfactant activity of eluates were evaluated by the drop collapse method, and the  
141 MeOH eluate was chosen and concentrated by rotary vacuum evaporator. The concentrate was

142 partitioned between ethyl acetate and water. The ethyl acetate portion showing biosurfactant  
143 activity was concentrated and applied to silica gel column chromatography (Merck, Germany)  
144 eluted with CHCl<sub>3</sub>:MeOH (50:1, 20:1, 10:1, 5:1, 2:1, and 1:1, v/v) (Fig 1). An active fraction,  
145 CHCl<sub>3</sub>:MeOH (20:1), was subjected to Sephadex LH-20 (GE Healthcare, Sweden) column  
146 chromatography eluted with CHCl<sub>3</sub>:MeOH (1:1, v/v). The fractions showing biosurfactant  
147 activity were combined and concentrated (Fig 1). The concentrate was further separated by the  
148 medium pressure liquid chromatography (MPLC, Teledyne ISCO, USA) equipped with  
149 Redisep Rf C<sub>18</sub> reversed-phase column (Teledyne Isco, USA) using a gradient of 70%→100%  
150 aq. MeOH to yield compound **1** (13.4 mg).

151

152 **Fig 1. Purification scheme of the biosurfactant produced by strain JAF-11.**

153

## 154 **Chemical structure analysis of biosurfactant**

155 The fast atom bombardment mass spectrum (FAB-MS) and high-resolution fast atom  
156 bombardment mass spectrum (HRFAB-MS) for the molecular weight and molecular formula,  
157 respectively, were measured using a JMS-700 MStation (JEOL, Japan) mass spectrometry.  
158 The nuclear magnetic resonance (NMR) spectra were obtained on a JEOL JNM-ECZ500R,  
159 500 MHz FT-NMR spectrometer at 500 MHz for <sup>1</sup>H NMR and at 125 MHz for <sup>13</sup>C NMR in  
160 CD<sub>3</sub>OD (Andover, USA). Chemical shifts are given in ppm (δ) with tetramethylsilane as the  
161 internal standard. For NMR spectra, two-dimensional NMR such as <sup>1</sup>H-<sup>1</sup>H correlated  
162 spectroscopy (<sup>1</sup>H-<sup>1</sup>H COSY), heteronuclear multiple quantum correlation (HMQC), and  
163 heteronuclear multiple bond correlation (HMBC) as well as one-dimensional NMR such as  
164 <sup>1</sup>H NMR and <sup>13</sup>C NMR were employed.

165

## 166 **Result and discussion**

### 167 **Isolation and identification of biosurfactant producing yeast**

168 Strain JAF-11 was isolated from *Prunus mume* Sieb. et Zucc. in Republic of Korea  
169 and was selected as a potential biosurfactant producer using modified drop collapse method  
170 (S1 Fig). Phylogenetic relationships of strain JAF-11 and the closely related strains were  
171 inferred using concatenated LSU and ITS sequences [23, 24]. The LSU and ITS sequences  
172 from the reference strains were obtained from GenBank database (Table 1). Phylogenetic  
173 analysis revealed that JAF-11 belonged to the family *Dothideales* clade, and formed one  
174 compact cluster with *Neodothiora populina* CPC 39399<sup>T</sup>, *Rhizosphaera macrospora* CBS  
175 208.79<sup>T</sup> and *Phaeocryptopus nudus* CBS 268.37 (Fig 2). The LSU region sequence of strain  
176 JAF-11 showed the highest similarity with those of *Rhizosphaera macrospora* CBS 208.79<sup>T</sup>  
177 (97.26%; 15nt substitutions in 548 nt) and *Neodothiora populina* CPC 39399<sup>T</sup> (97.75%; 13nt  
178 substitutions in 578 nt). In the ITS region sequences, strain JAF-11 had sequence similarity of  
179 95.15% (26 nt substitutions in 536 nt) with *Rhizosphaera macrospora* CBS 208.79<sup>T</sup> and 94.27%  
180 (31 nt substitutions in 541 nt) with *Neodothiora populina* CPC 39399<sup>T</sup>. According to Duong  
181 Vu et al. (2016), the taxonomic threshold predicted to discriminate yeast species is 98.41% in  
182 the LSU region and 99.51% in the ITS region [25]. Consequently, we propose that strain JAF-  
183 11 represents a novel yeast species of a new genus based on phylogenetic analysis and the  
184 taxonomic thresholds of gene sequence identities.

185

186 **Table 1.** GenBank accession numbers of species used in phylogenetic analyses

| Species                         | Strain no. | GenBank accession no. |            |
|---------------------------------|------------|-----------------------|------------|
|                                 |            | LSU                   | ITS        |
| <b>Family Dothideaceae</b>      |            |                       |            |
| <i>Coleophoma crateriformis</i> | CBS 473.69 | MH871117.1            | MH859358.1 |
| <i>Coleophoma oleae</i>         | CBS 615.72 | MH872293.1            | KU728511.1 |



|                                      |                           |             |            |
|--------------------------------------|---------------------------|-------------|------------|
| <i>Cylindroseptoria ceratoniae</i>   | CBS 477.69 <sup>T</sup>   | KF251655.1  | KF251151.1 |
| <i>Delphinella strobiligena</i>      | CBS 735.71                | MH872074.1  | MH860318.1 |
| <i>Dothidea insculpta</i>            | CBS 189.58                | MH869284.1  | AF027764.1 |
| <i>Dothidea sambuci</i>              | AFTOL-ID 274 <sup>T</sup> | AY544681.1  | DQ491505.1 |
| <i>Dothidea sambuci</i>              | DAOM 231303 <sup>T</sup>  | NG_027611.1 | AY883094.1 |
| <i>Dothiora cannabinae</i>           | CBS 737.71 <sup>T</sup>   | MH872076.1  | MH860320.1 |
| <i>Dothiora corymbiae</i>            | CBS 145060 <sup>T</sup>   | MK047482.1  | MK047431.1 |
| <i>Dothiora elliptica</i>            | CBS 736.71                | MH872075.1  | KU728502.1 |
| <i>Endoconidioma populi</i>          | UAMH 10902                | HM185488.1  | HM185487.1 |
| <i>Neocylindroseptoria pistaciae</i> | CBS 471.69 <sup>T</sup>   | MH871115.1  | MH859357.1 |
| <i>Neodothiora populina</i>          | CPC 39399 <sup>T</sup>    | MW175405.1  | MW175365.1 |
| <i>Phaeocryptopus nudus</i>          | CBS 268.37                | GU301856.1  | EU700371.1 |
| <i>Plowrightia ribesiae</i>          | MFLU 14-0040              | KM388552.1  | KM388544.1 |
| <i>Pringsheimia smilacis</i>         | CBS 873.71                | FJ150970.1  | MH860390.1 |
| <i>Rhizosphaera macrospora</i>       | CBS 208.79 <sup>T</sup>   | MH872971.1  | MH861202.1 |
| <i>Stylodothis puccinioides</i>      | CBS 193.58                | MH869286.1  | MH857753.1 |
| <i>Sydowia polyspora</i>             | CBS 116.29                | MH866487.1  | MH855019.1 |
| <b>Family Aureobasidiaceae</b>       |                           |             |            |
| <i>Aureobasidium leucospermi</i>     | CPC 15180                 | JN712555.1  | JN712489.1 |
| <i>Aureobasidium leucospermi</i>     | CBS 130593 <sup>T</sup>   | MH877257.1  | KT693727.1 |
| <i>Aureobasidium proteae</i>         | CPC 2825                  | JN712558.1  | JN712492.1 |
| <i>Aureobasidium pullulans</i>       | MFLUCC 14-0288            | KM461701.1  | KM388542.1 |
| <i>Aureobasidium pullulans</i>       | CBS 584.75 <sup>T</sup>   | DQ470956.1  | FJ150906.1 |
| <i>Kabatiella lini</i>               | CBS 125.21 <sup>T</sup>   | FJ150946.1  | FJ150897.1 |
| <b>Family Cladosporiaceae</b>        |                           |             |            |
| <i>Rachicladosporium cboliae</i>     | CBS 125424 <sup>T</sup>   | MH875168.1  | MH863703.1 |

187

188 **Fig 2. Phylogenetic tree of concatenated LSU and ITS region sequences of closely related**  
 189 **species.** *Rachicladosporium cboliae* was used as the outgroup in the phylogenetic tree. The  
 190 phylogenetic tree was constructed using the maximum likelihood method and Tamura-Nei  
 191 model with bootstrap values 1,000 replicates. The scale bar indicates substitutions per  
 192 nucleotide position.

193

## 194 Surface-active properties of biosurfactant

195 Growth of strain JAF-11 in culture medium was detected by measuring absorbance at  
 196 660 nm and surface tensions of the aqueous supernatant was measured using force tensiometer

197 K11 (Krüss, Germany). While the growth of the strain increased continuously for 8 days, the  
198 surface tension of the supernatant decreased from 53 mN/m to 34.5 mN/m for 6 days and  
199 increased again after 7 days. The surface tension recorded the lowest values of 34.5~34.6 mN/m  
200 after 5-6 days of incubation (Fig 3). The above results indicated that the highest biosurfactant  
201 production in strain JAF-11 is reached at 5-6 days before the stationary growth phase.

202

203 **Fig 3. Time course of growth kinetics and surface tension in culture medium during**  
204 **cultivation of strain JAF-11.**

205

206 The critical micelle concentration (CMC) is defined as the concentration of surfactant  
207 required to start the micelles formation. It is determined by plotting the surface tension  
208 measured according to the concentration of biosurfactant and identifying the point at which the  
209 surface tension of the biosurfactant no longer decreases dramatically. As a results of measuring  
210 surface tension of the water with the crude biosurfactants isolated from culture medium, the  
211 values were from 72.23 mN/m to 32.80 mN/m and the minimum surface tension value was  
212 32.80 mN/m. In particular, the value of CMC was 24 mg/L that the concentration of the  
213 biosurfactant obtained from slope of the curve abruptly changed as shown in Figure 4.

214

215 **Fig 4. Determination of critical micelle concentration of producing crude biosurfactant**  
216 **from strain JAF-11.**

217

## 218 **Chemical structure of the isolated compound**

219 Chemical structure of the biosurfactant isolated was determined by mass and NMR  
220 measurements. The molecular weight of 502 was determined by the FAB-MS measurement,  
221 which showed a quasi-molecular ion peak at  $m/z$  503  $[M+H]^+$  (Fig 5). The molecular formula,  
222  $C_{26}H_{46}O_9$ , was determined by the HR-FAB-MS providing a molecular ion peak at  $m/z$  503.3243

223 [M+H]<sup>+</sup> (calcd. for C<sub>26</sub>H<sub>47</sub>O<sub>9</sub>, 503.3220), indicating four degrees of unsaturation. The <sup>1</sup>H NMR  
224 spectrum of **1** (Table 2) showed signals due to six oxygenated methines at δ<sub>H</sub> 5.50 (t, *J* = 2.7  
225 Hz, H-2), 5.28 (t, *J* = 10.0 Hz, H-4), 4.93 (dd, *J* = 10.0, 2.7 Hz, H-3), 3.66 (t, *J* = 9.5 Hz, H-  
226 6), 3.65 (dd, *J* = 10.0, 2.7 Hz, H-1), and 3.45 (t, *J* = 9.0 Hz, H-5). It also showed signals  
227 attributable to 14 methylenes at δ<sub>H</sub> 2.45 (m, H-2')/2.42 (m, H-2''), 2.36 (m, H-2'')/2.31 (m, H-  
228 2''), 2.18 (m, H-2'''), 1.68 (m, H-3'), 1.59 (m, H-3''), 1.55 (m, H-3'''), and 1.35-1.25 (overlapped)  
229 and three methyls at δ<sub>H</sub> 0.90 (overlapped). The <sup>13</sup>C NMR spectrum (Table 2) in combination  
230 with HMQC spectrum displayed signals due to three carbonyl carbons at δ<sub>C</sub> 175.0 (C-1'), 174.6  
231 (C-1''), and 174.2 (C-1'''), six oxygenated methine carbons at δ<sub>C</sub> 74.6 (C-6), 74.2 (C-5), 73.2  
232 (C-4), 72.6 (C-2), 71.7 (C-3), and 70.9 (C-1), 14 methylene carbons at δ<sub>C</sub> 23.4–35.2, and three  
233 methyl carbons at δ<sub>C</sub> 14.4 (C-6''') and 14.2 (C-8' and C-6''). The <sup>1</sup>H-<sup>1</sup>H COSY correlations  
234 among six oxygenated methine protons established the presence of an inositol moiety. Inositol  
235 moiety was identified as a *myo*-inositol by the proton coupling constant. Except for an  
236 equatorial proton at δ<sub>H</sub> 5.50 (H-2) with coupling constant of 2.7 Hz, other protons occupied an  
237 axial position based on their proton coupling constants. The <sup>1</sup>H-<sup>1</sup>H COSY spectrum also  
238 established six partial structures in three acyl chains, as shown in Fig 6B. Chemical structure  
239 was unambiguously determined by the HMBC spectrum, which exhibited the long-range  
240 correlations from two methyl protons at δ<sub>H</sub> 0.90 (H-8'' and H-8''') to two methylene carbons at  
241 δ<sub>C</sub> 32.4 (C-4'' and C-4'''), from the methylene proton at δ<sub>H</sub> 1.59 to the carbonyl carbon at δ<sub>C</sub>  
242 174.6 and the methylene carbons at δ<sub>C</sub> 32.4 and 23.4, and the methylene proton at δ<sub>H</sub> 1.55 to  
243 the carbonyl carbon at δ<sub>C</sub> 174.2 and the methylene carbons at δ<sub>C</sub> 32.4 and 23.4, implying the  
244 presence of two hexanoyl moieties. Other HMBC correlations from the methylene protons at  
245 δ<sub>H</sub> 2.45/2.42 and 1.68 to the carbons at δ<sub>C</sub> 175.0 and 30.2 and from the methyl protons at δ<sub>H</sub>  
246 0.90 to the carbon at δ<sub>C</sub> 32.9, and 14 methylenes in the <sup>1</sup>H and <sup>13</sup>C NMR spectra indicated the

247 presence of an octanoyl moiety. Finally, the long-range correlations from the oxygenated  
248 methines at  $\delta_{\text{H}}$  5.50, 4.93, and 5.28 to the carbonyl carbons at  $\delta_{\text{C}}$  175.0, 174.2, and 174.6,  
249 respectively, revealed that C-2, C-3, and C-4 in inositol moiety were acylated with one octanoyl  
250 and two hexanoyl groups, as shown in Fig 6B. Taken together, the structure of compound **1**  
251 was determined to be a new myo-inositol derivative and was named JAF-11. This compound  
252 was very similar to pullusurfactan E isolated from *Aureobasidium pullulans* strain A11211-4-  
253 57 from fleabane flower, *Erigeron annuus* (L.) pers. [26], except for the presence of octanoyl  
254 moiety instead of hexanoyl moiety in pullusurfactan E (Fig 6A). Although the chemical  
255 structure is similar to pullusurfactan E, this study reports the isolation of a new biosurfactant  
256 from the novel yeast strain JAF-11 for the first time.

257

258 **Fig 5. Fast atom bombardment mass spectrum of purified biosurfactant in the positive**  
259 **ion mode.**

260

261 **Table 2.**  $^1\text{H}$  and  $^{13}\text{C}$  NMR spectral data of new biosurfactant in  $\text{CD}_3\text{OD}$ .

| No. | $\delta_{\text{C}}$ | $\delta_{\text{H}}$                          |
|-----|---------------------|----------------------------------------------|
| 1   | 70.9                | 3.65 (1H, dd, $J = 10.0, 2.7$ ) <sup>a</sup> |
| 2   | 72.6                | 5.50 (1H, t, $J = 2.7$ )                     |
| 3   | 71.7                | 4.93 (1H, dd, $J = 10.0, 2.7$ )              |
| 4   | 73.2                | 5.28 (1H, t, $J = 10.0$ )                    |
| 5   | 74.2                | 3.45 (1H, t, $J = 9.0$ )                     |
| 6   | 74.6                | 3.66 (1H, t, $J = 9.5$ )                     |
| 1'  | 175.0               |                                              |
| 2'  | 35.2                | 2.42 (1H, m), 2.45 (1H, m)                   |
| 3'  | 26.3                | 1.68 (2H, m)                                 |
| 4'  | 30.2                | 1.38 (2H, m)                                 |
| 5'  | 30.2                | 1.25-1.35 (2H, m)                            |
| 6'  | 32.9                | 1.25-1.35 (2H, m)                            |
| 7'  | 23.7                | 1.25-1.35 (2H, m)                            |
| 8'  | 14.2                | 0.90 (3H, overlapped)                        |
| 1'' | 174.6               |                                              |
| 2'' | 35.1                | 2.31 (1H, m), 2.36 (1H, m)                   |
| 3'' | 25.7                | 1.59 (2H, m)                                 |
| 4'' | 32.4                | 1.32 (2H, m)                                 |
| 5'' | 23.4                | 1.25-1.35 (2H, m)                            |

|      |       |                       |
|------|-------|-----------------------|
| 6''  | 14.2  | 0.90 (3H, overlapped) |
| 1''' | 174.2 |                       |
| 2''' | 35.0  | 2.18 (2H, m)          |
| 3''' | 25.4  | 1.55 (2H, m)          |
| 4''' | 32.4  | 1.28 (2H, m)          |
| 5''' | 23.4  | 1.25-1.35 (2H, m)     |
| 6''' | 14.4  | 0.90 (3H, overlapped) |

262 <sup>a</sup> Proton resonance integral, multiplicity, and coupling constant ( $J$ =Hz) in parentheses

263

264 **Fig 6. (A) Chemical structure of novel biosurfactant and (B) two-dimensional NMR**  
265 **correlations of novel biosurfactant.**

266

## 267 **Acknowledgments**

268 Authors thank Ms. Ji-Young Oh, Center for University-wide Research Facilities (CURF) at  
269 Jeonbuk National University, for performing NMR measurements.

270

271

272

273

274

275

276

277

278

279

280

## References

- 281
- 282
- 283 1. Pacwa-Płociniczak MP, Plaza GA, Piotrowska-Seget Z, Cameotra SS. Environmental  
284 applications of biosurfactants: recent advances. *Int J Mol Sci.* 2011;12(1):633-54.
- 285 2. Ramani K, Jain SC, Mandal AB, Sekaran G. Microbial induced lipoprotein biosurfactant  
286 from slaughterhouse lipid waste and its application to the removal of metal ions from aqueous  
287 solution. *Colloids Surf. B.* 2012;97:254-63.
- 288 3. Vaz DA, Gudiña EJ, Alameda EJ, Teixeira JA, Rodrigues LR. Performance of a  
289 biosurfactant produced by a *Bacillus subtilis* strain isolated from crude oil samples as compared  
290 to commercial chemical surfactants. *Colloids Surf. B.* 2012;89:167-74.
- 291 4. Rebello S, Asok AK, Mundayoor S, Jisha MS. Surfactants: toxicity, remediation and green  
292 surfactants. *Environ Chem Lett.* 2014;12(2):275-87.
- 293 5. Singh P, Tiwary BN. Isolation and characterization of glycolipid biosurfactant produced by  
294 a *Pseudomonas otitidis* strain isolated from Chirimiri coal mines, India. *Bioresour Bioprocess.*  
295 2016;3(1):42.
- 296 6. Claus S, Van Bogaert INA. Sophorolipid production by yeasts: a critical review of the  
297 literature and suggestions for future research. *Appl Microbiol Biotechnol.* 2017;101:7811-21.
- 298 7. Kosaric N. Biosurfactants in industry. *Pure and Applied Chemistry.* 1992;64(11):1731-7.
- 299 8. Desai JD, Banat IM. Microbial production of surfactants and their commercial potential.  
300 *Microbiol Mol Biol Rev.* 1997;61(1):47-64.
- 301 9. Rahman KSM, Rahman TJ, Kourkoutas Y, Petsas I, Marchant R, Banat IM. Enhanced  
302 bioremediation of n-alkane in petroleum sludge using bacterial consortium amended with  
303 rhamnolipid and micronutrients. *Bioresour Technol.* 2003;90(2):159-68.
- 304 10. Das K, Mukherjee AK. Comparison of lipopeptide biosurfactants production by *Bacillus*  
305 *subtilis* strains in submerged and solid state fermentation systems using a cheap carbon source:

- 306 Some industrial applications of biosurfactants. *Process Biochem.* 2007;42(8):1191-9.
- 307 11. Das P, Mukherjee S, Sen R. Improved bioavailability and biodegradation of a model  
308 polyaromatic hydrocarbon by a biosurfactant producing bacterium of marine origin.  
309 *Chemosphere.* 2008;72(9):1229-34.
- 310 12. Mnif I, Ellouz-Chaabouni S, Ghribi D. Glycolipid biosurfactants, main classes, functional  
311 properties and related potential applications in environmental biotechnology. *J Polym Environ.*  
312 2018;26(5):2192-206.
- 313 13. Chen J, Wu Q, Hua Y, Chen J, Zhang H, Wang H. Potential applications of biosurfactant  
314 rhamnolipids in agriculture and biomedicine. *Appl Microbiol and Biotechnol.*  
315 2017;101(23):8309-19.
- 316 14. Bergström S, Theorell H, Davide H. On a metabolic product of *Ps. Pyocyanea*, Pyolipic  
317 acid, active against *M. tuberculosis*. *Arch Biochem.* 1946;10:165-6.
- 318 15. Henkel M, Müller MM, Kügler JH, Lovaglio RB, Contiero J, Syldatk C, et al. Rhamnolipids  
319 as biosurfactants from renewable resources: Concepts for next-generation rhamnolipid  
320 production. *Process Biochem.* 2012;47(8):1207-19.
- 321 16. Van Bogaert INA, Zhang J, Soetaert W. Microbial synthesis of sophorolipids. *Process*  
322 *Biochem.* 2011;46(4):821-33.
- 323 17. Jezierska S, Claus S, Van Bogaert I. Yeast glycolipid biosurfactants. *FEBS Lett.*  
324 2018;592(8):1312-29.
- 325 18. Morita T, Fukuoka T, Imura T, Kitamoto D. Mannosylerythritol lipids: production and  
326 applications. *J Oleo Sci.* 2015;64(2):133-41
- 327 19. Shekhar S, Sundaramanickam A, Balasubramanian T. Biosurfactant producing microbes  
328 and their potential applications: A review. *Crit Rev Environ Sci Technol.* 2015;45(14):1522-  
329 54.
- 330 20. Jain DK, Collins-Thompson DL, Lee H, Trevors JT. A drop-collapsing test for screening

- 331 surfactant-producing microorganisms. *Journal of Microbiological Methods*. 1991;13(4):271-9.
- 332 21. Kim JS, Lee IK, Yun BS. A novel biosurfactant produced by *Aureobasidium pullulans* L3-  
333 GPY from a Tiger lily wild flower, *Lilium lancifolium* Thunb. *PLoS One*. 2015;10(4):e0122917.
- 334 22. Sheppard JD, Mulligan CN. The production of surfactin by *Bacillus subtilis* grown on peat  
335 hydrolysate. *Appl Microbiol Biotechnol*. 1987;27(2):110-6.
- 336 23. Thambugala KM, Ariyawansa HA, Li Y-M, Boonmee S, Hongsanan S, Tian Q, et al.  
337 Dothideales. *Fungal Divers*. 2014;68(1):105-58.
- 338 24. Crous PW, Cowan DA, Maggs-Kölling G, Yilmaz N, Larsson E, Angelini C, et al. Fungal  
339 planet description sheets: 1112-1181. *Persoonia*. 2020;45:251-409.
- 340 25. Vu D, Groenewald M, Szöke S, Cardinali G, Eberhardt U, Stielow B, et al. DNA barcoding  
341 analysis of more than 9,000 yeast isolates contributes to quantitative thresholds for yeast  
342 species and genera delimitation. *Stud Mycol*. 2016;85:91-105.
- 343 26. Kim JS, Lee IK, Yun BS. Pullusurfactans A-E, new biosurfactants produced by  
344 *Aureobasidium pullulans* A11211-4-57 from a fleabane, *Erigeron annuus* (L.) pers. *J Antibiot*  
345 (Tokyo). 2018;71:920-6.

346

347

348

349

350

351

352

353

354



## 355 **Supporting information**

356 **S1 Fig. Screening of biosurfactant producing yeast by drop collapse method.** Distilled  
357 water and fresh culture broth were used as a control.

358 **S2 Fig.  $^1\text{H}$  NMR spectrum of the purified biosurfactant**

359 **S3 Fig.  $^{13}\text{C}$  NMR spectrum of the purified biosurfactant**

360 **S4 Fig. HMQC spectrum of the purified biosurfactant**

361 **S5 Fig.  $^1\text{H}$ - $^1\text{H}$  COSY spectrum of the purified biosurfactant**

362 **S6 Fig. HMBC spectrum of the purified biosurfactant**

363

## 364 **Funding**

365 This work was supported by a grant National Institute of Agricultural Science, Rural  
366 Development Administration (Project No. PJ01354906, PJ01567501) in Korea.

367

368

369

# Growth medium of strain JAF-11 (8L)

## Diaion HP-20 column chromatography

eluted with 30-100% aqueous MeOH

Pass

30% MeOH

70% MeOH

100% MeOH

## Ethyl acetate partition

Ethyl acetate layer

Aqueous layer

## Flash silica gel column chromatography

eluted with chloroform-MeOH (50:1 → 1:1)

Fraction chloroform-MeOH (20:1)

## Sephadex LH-20 column chromatography

eluted with chloroform-MeOH (1:1)

Fraction 9-17

## Reversed phase MPLC

eluted with 70-100% aqueous MeOH

**Biosurfactant isolated from strain JAF-11 (13.4mg)**

bioRxiv preprint doi: <https://doi.org/10.1101/2022.03.15.484497>; this version posted March 15, 2022. The copyright holder for this preprint (which was not certified by peer review) is the author/funder, who has granted bioRxiv a license to display the preprint in perpetuity. It is made available under aCC-BY 4.0 International license.

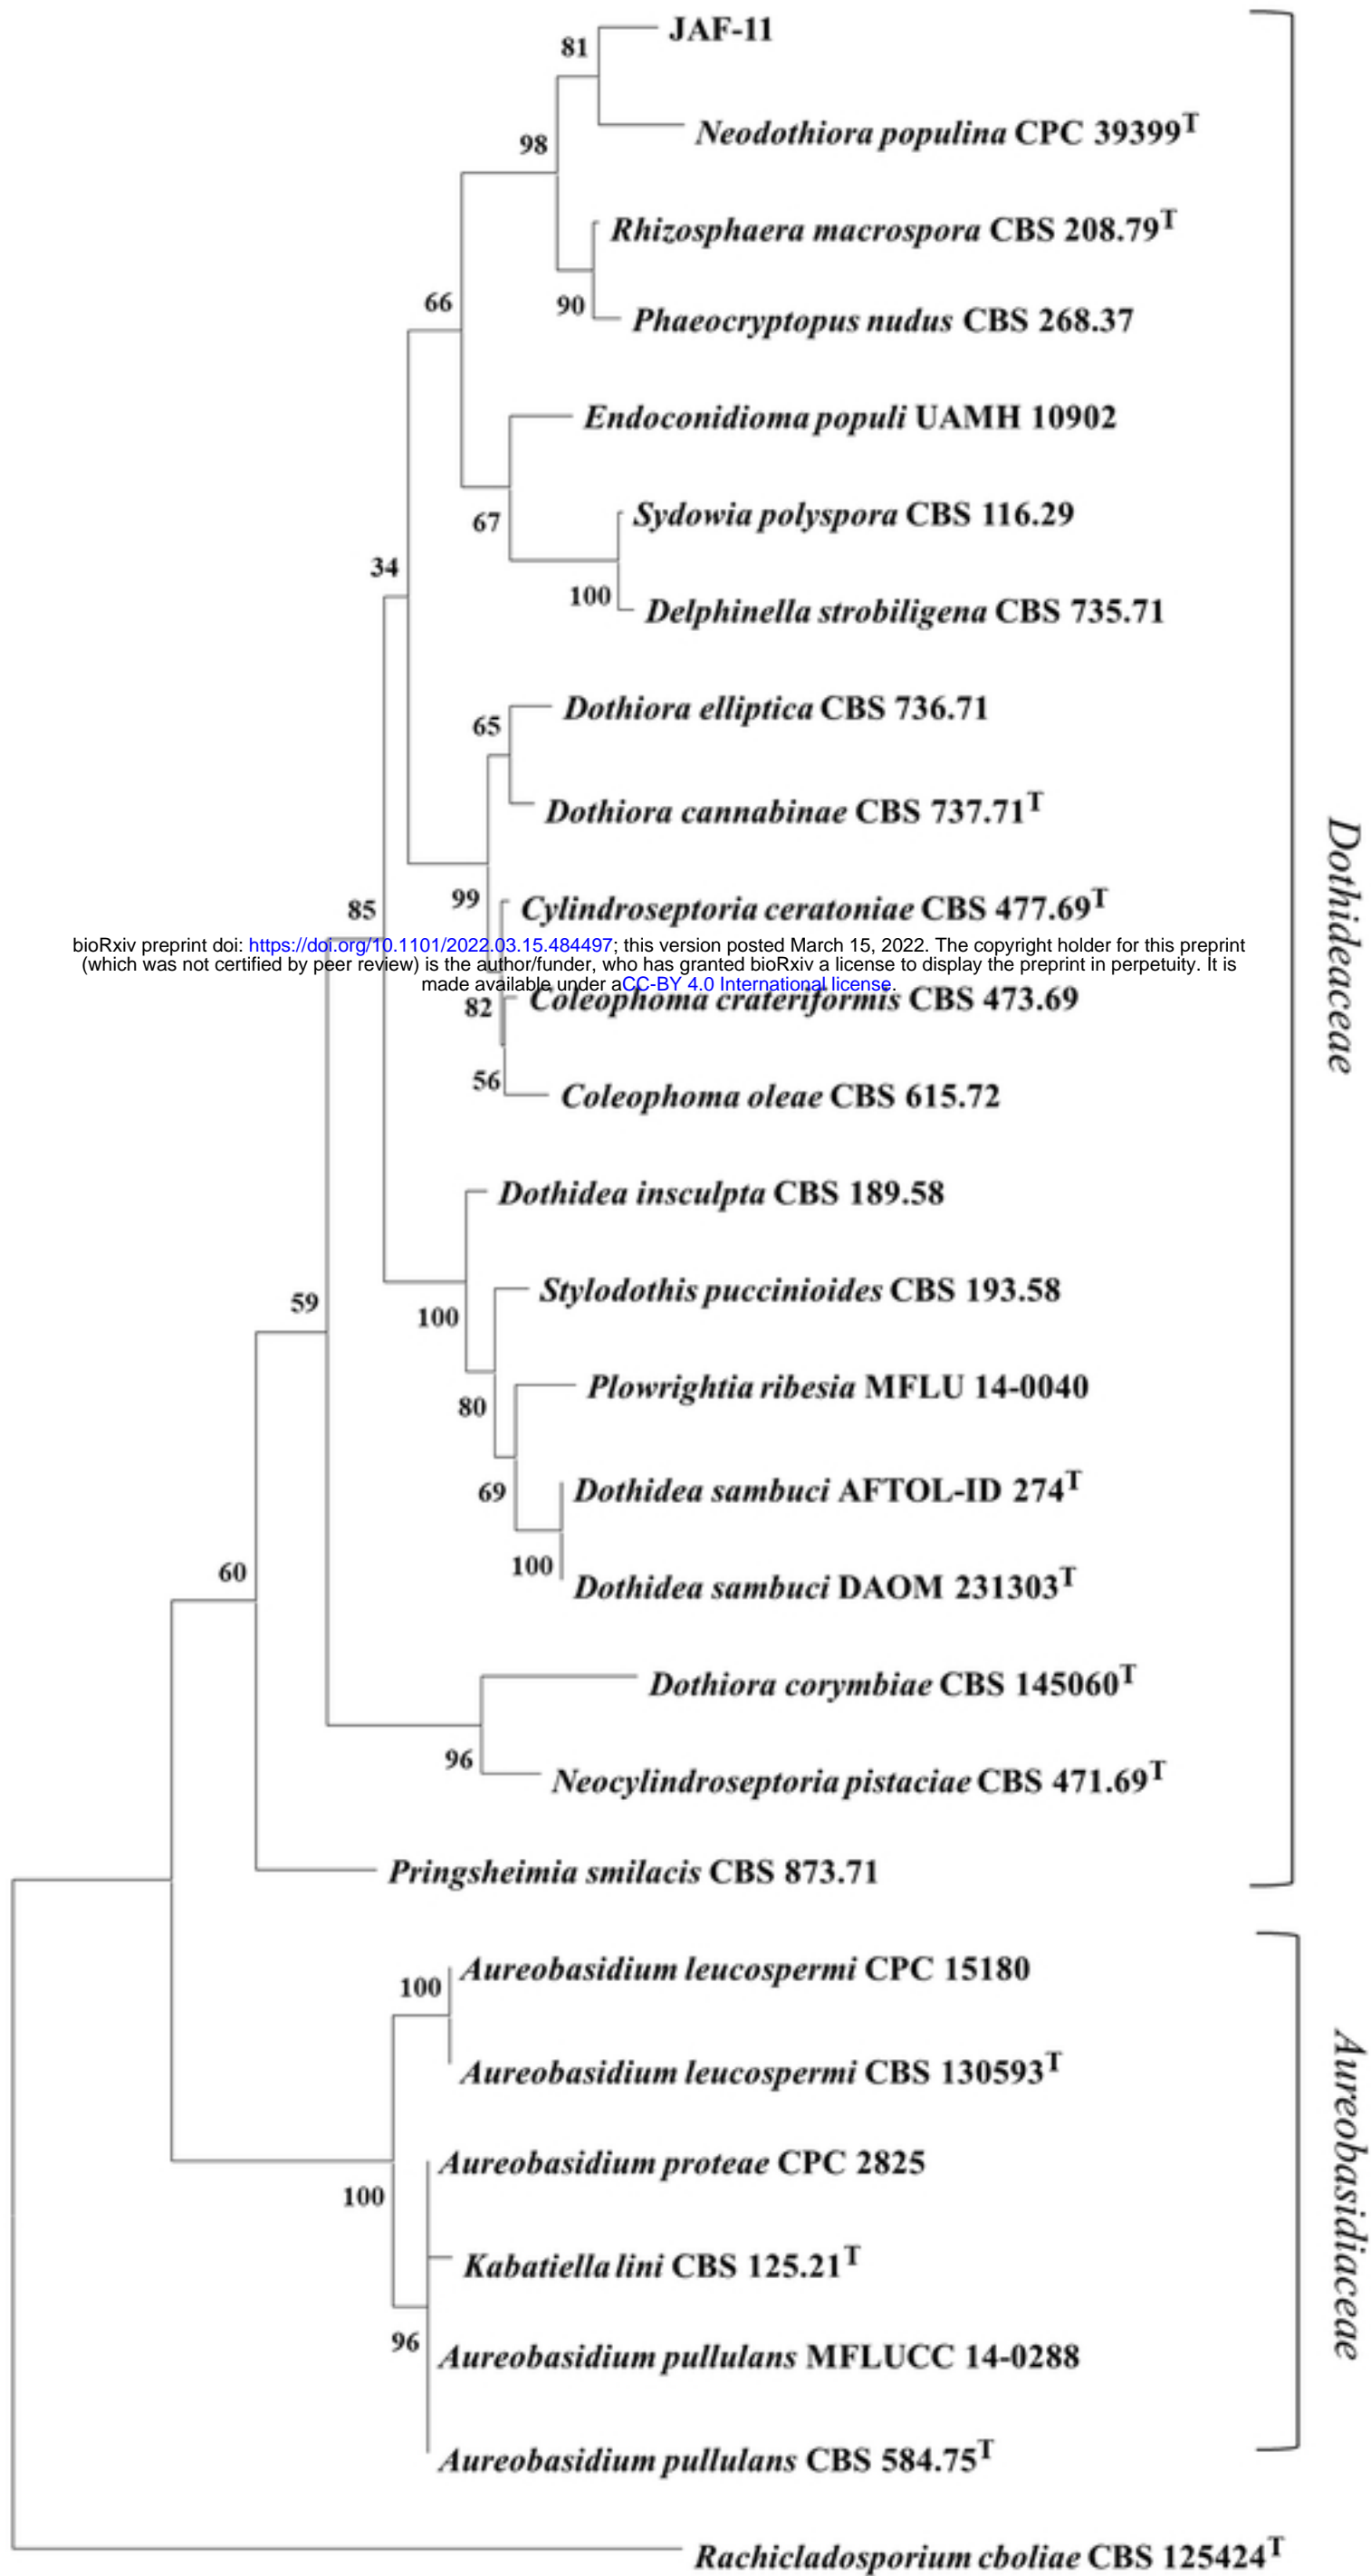

Fig2

# Surface tension

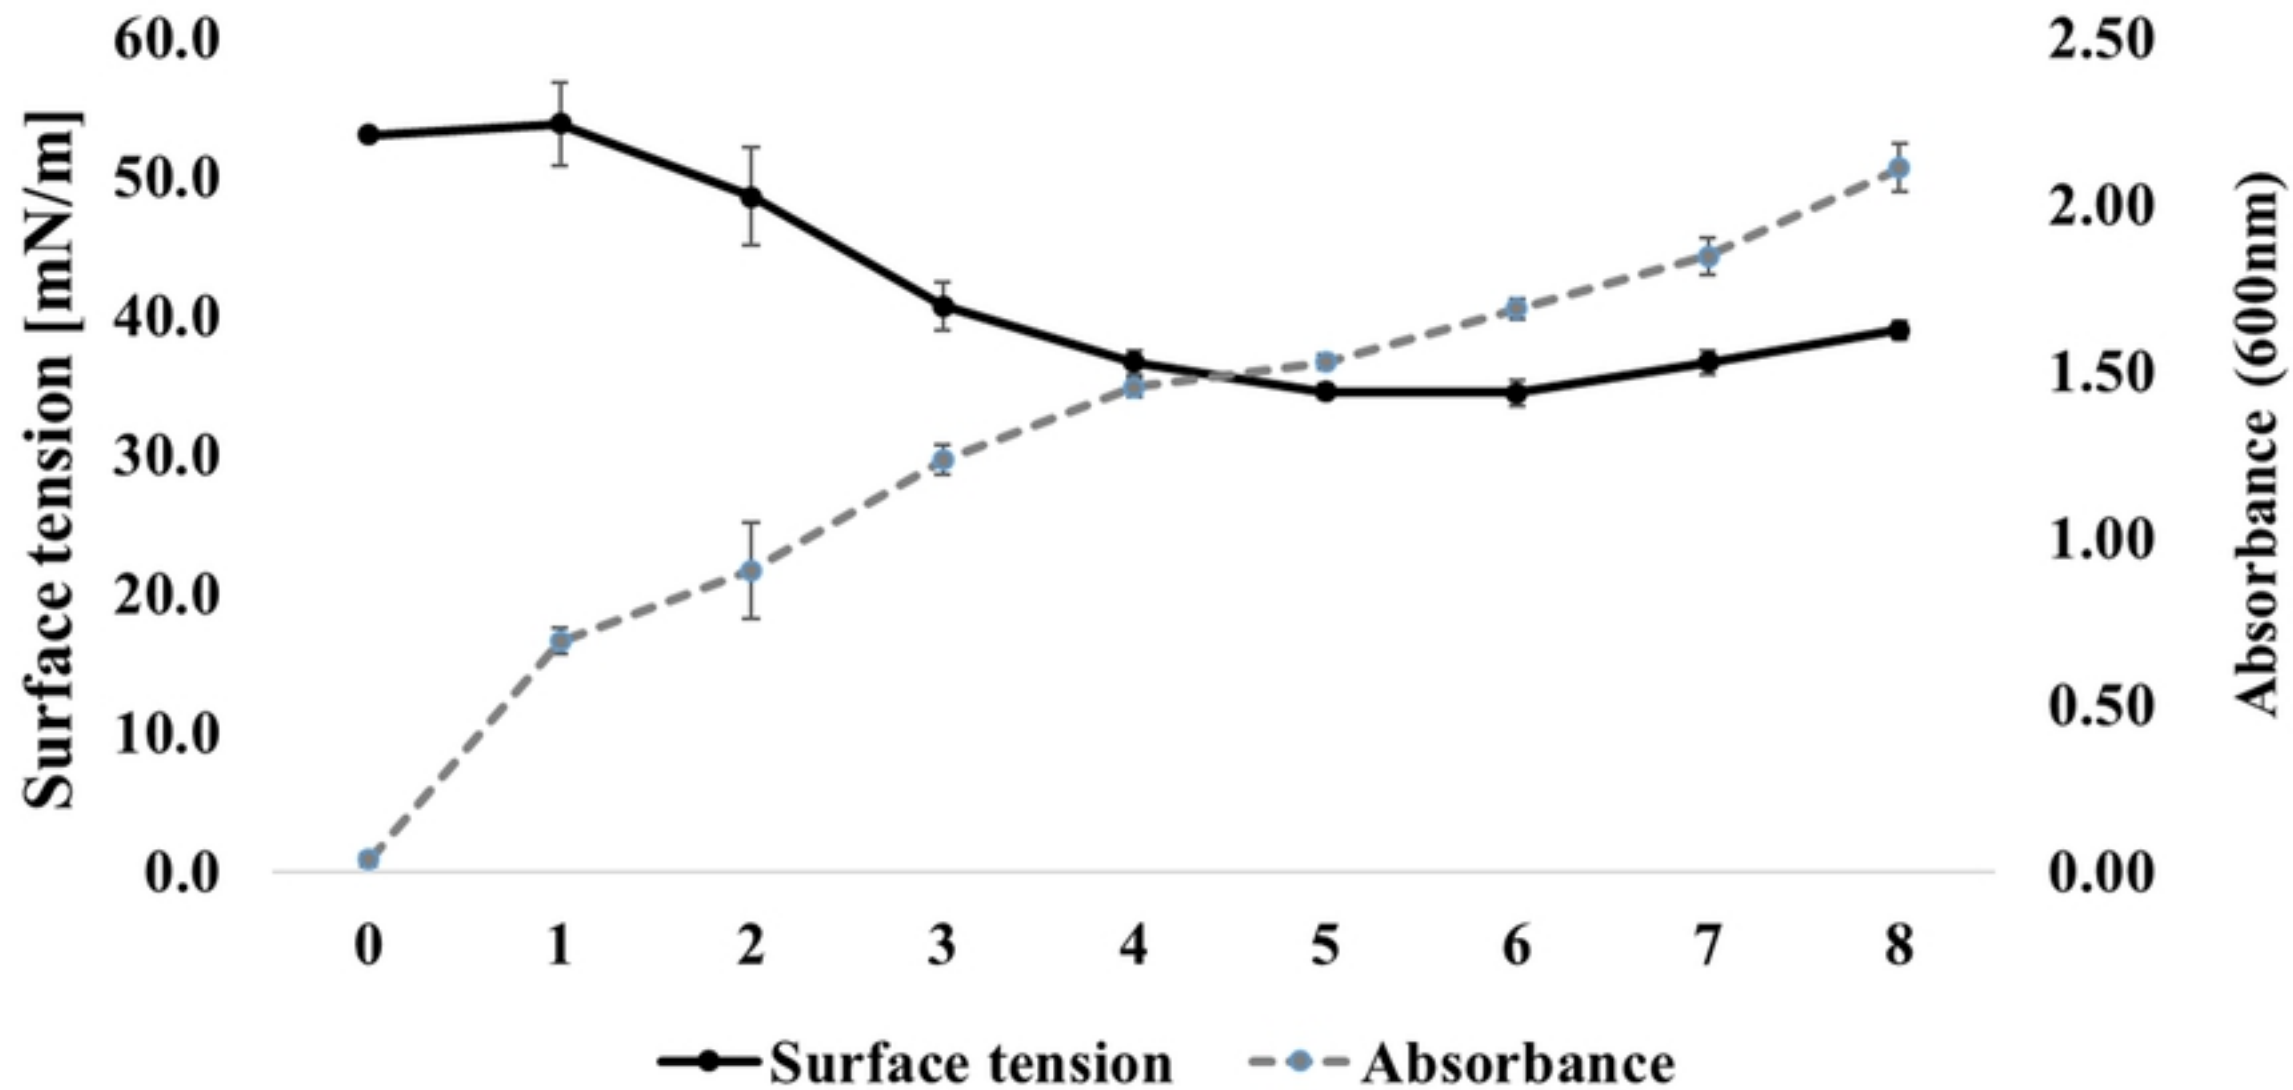

Fig3

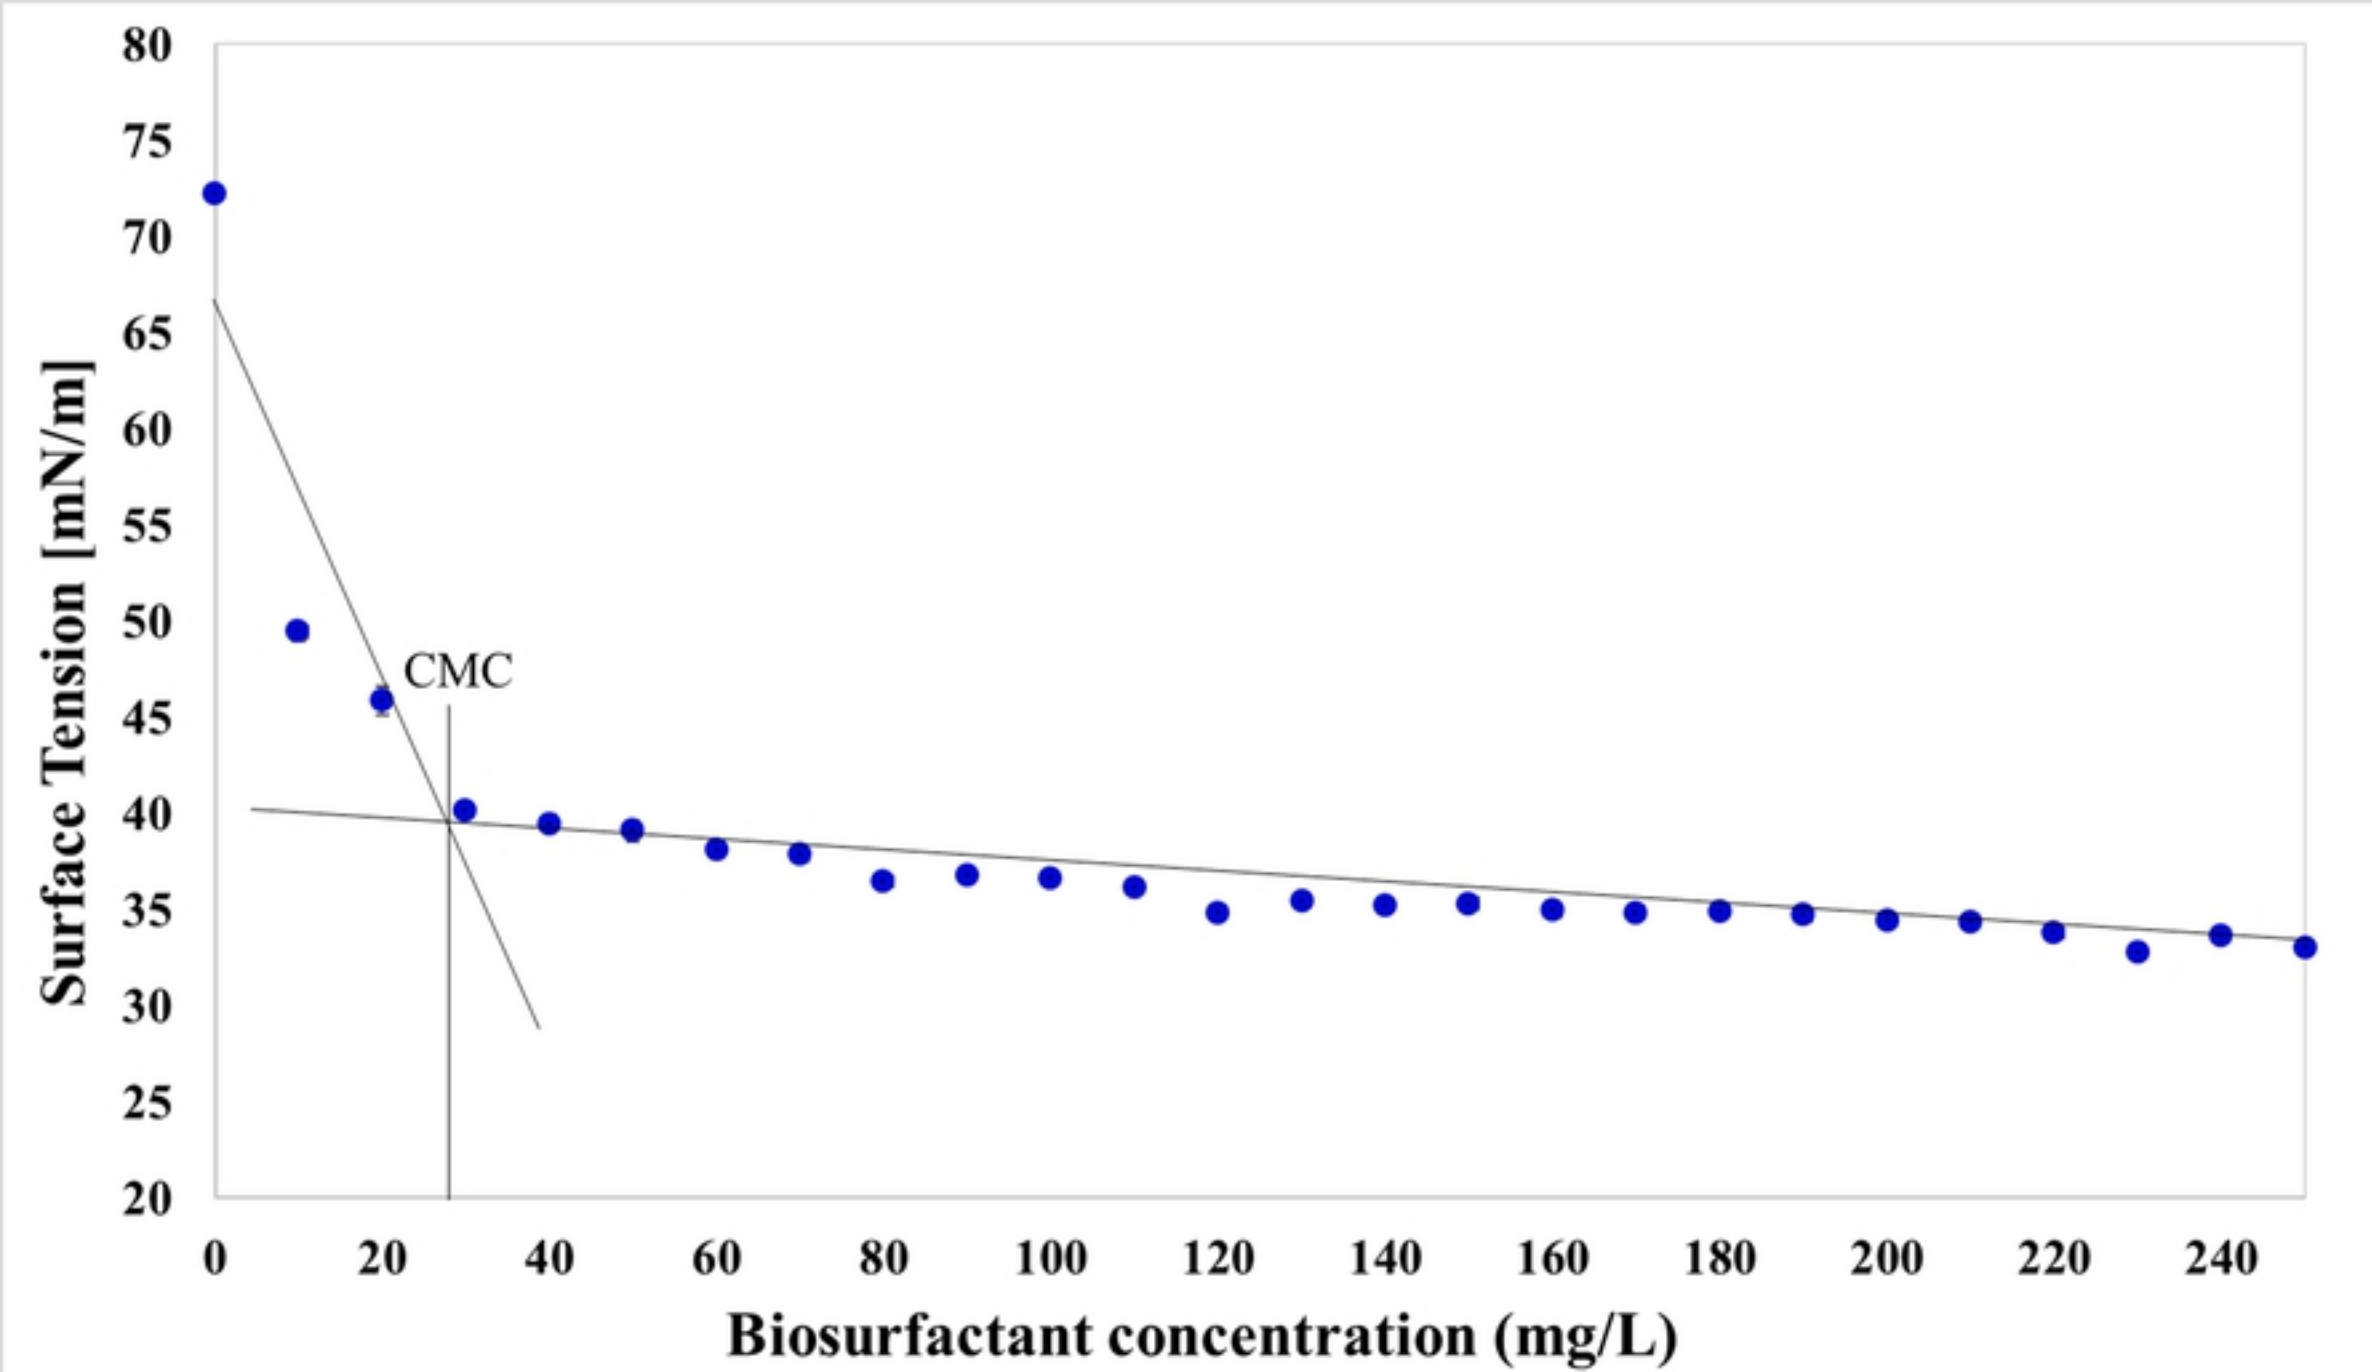

Fig4

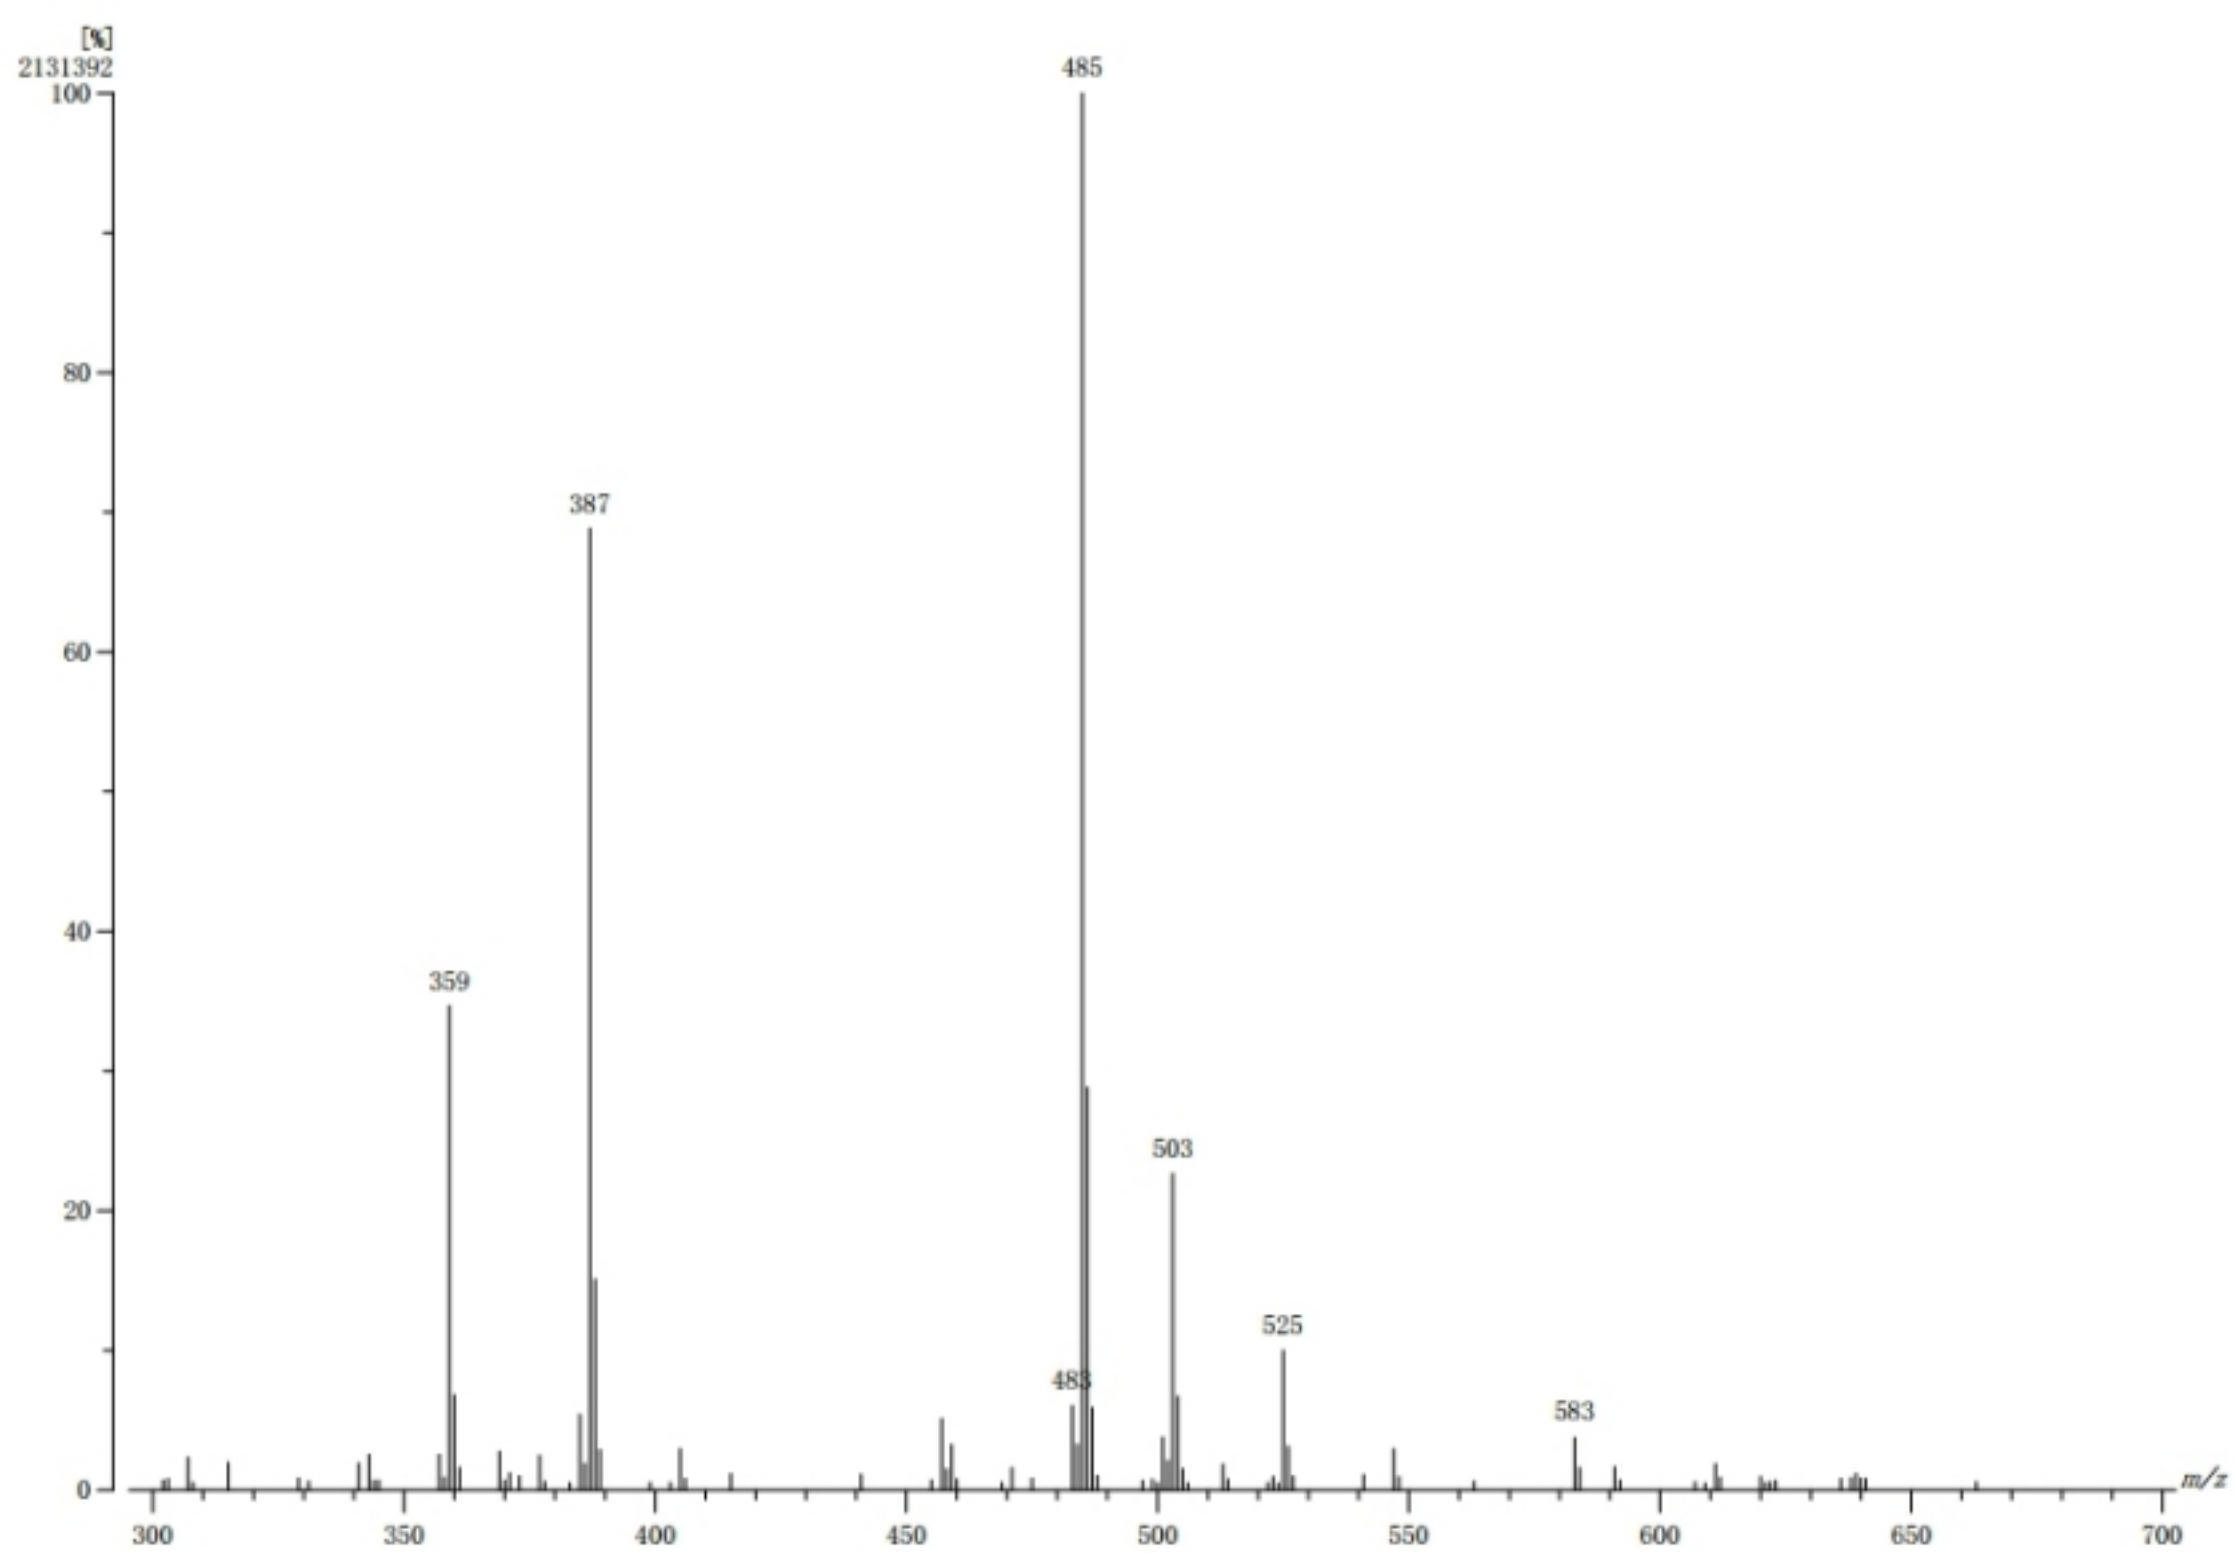

Fig5

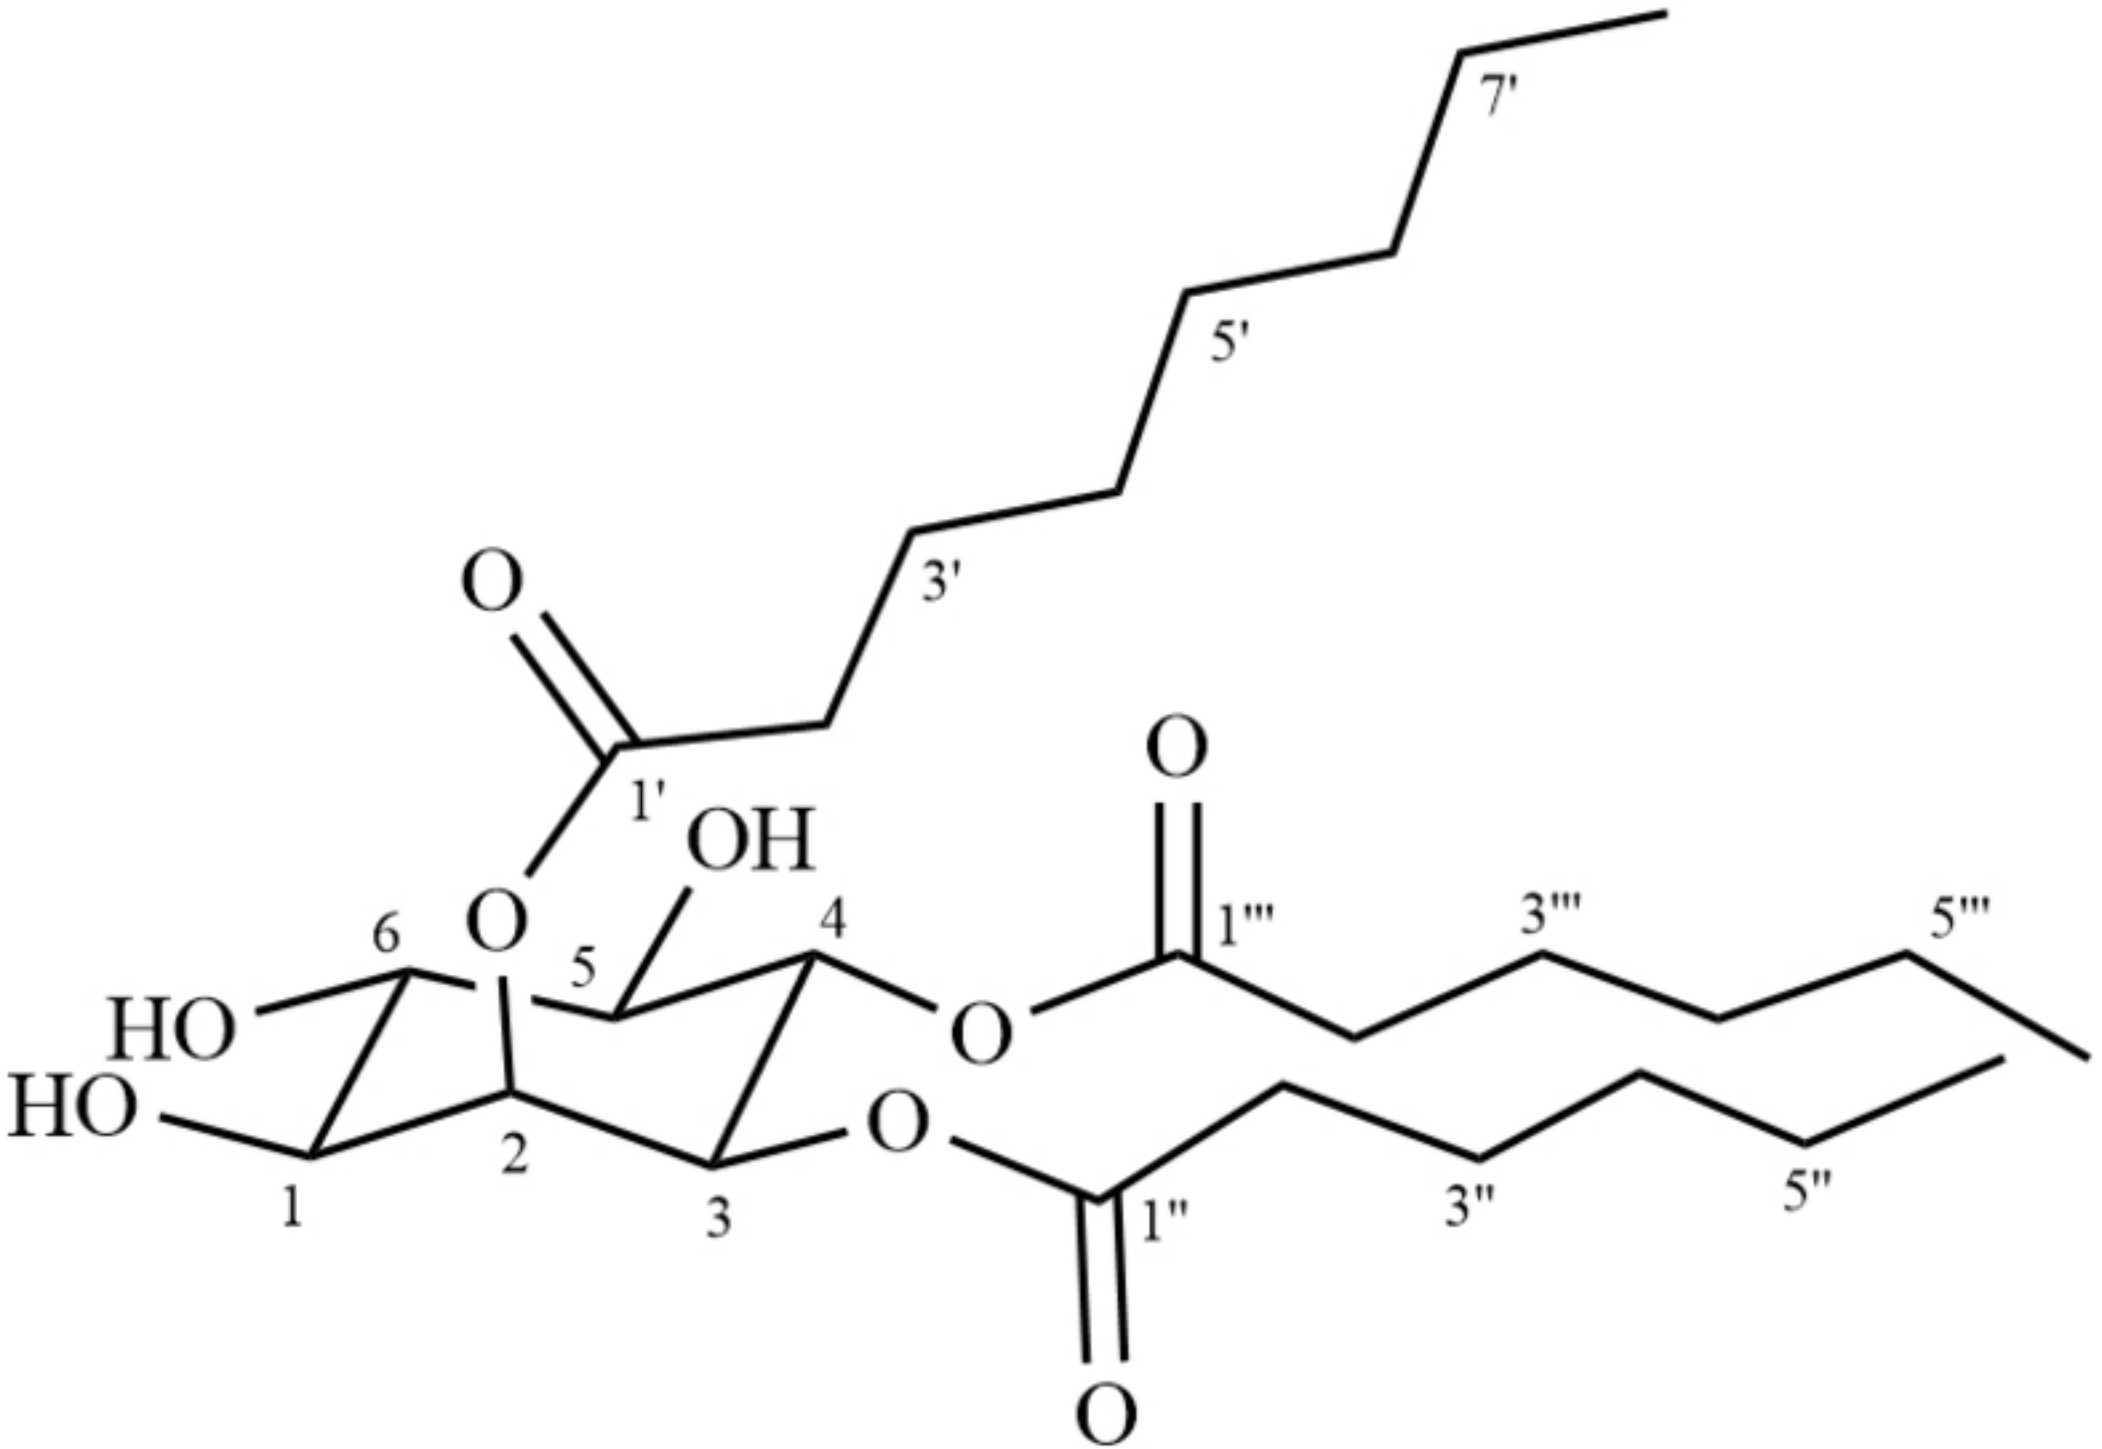

Fig6A

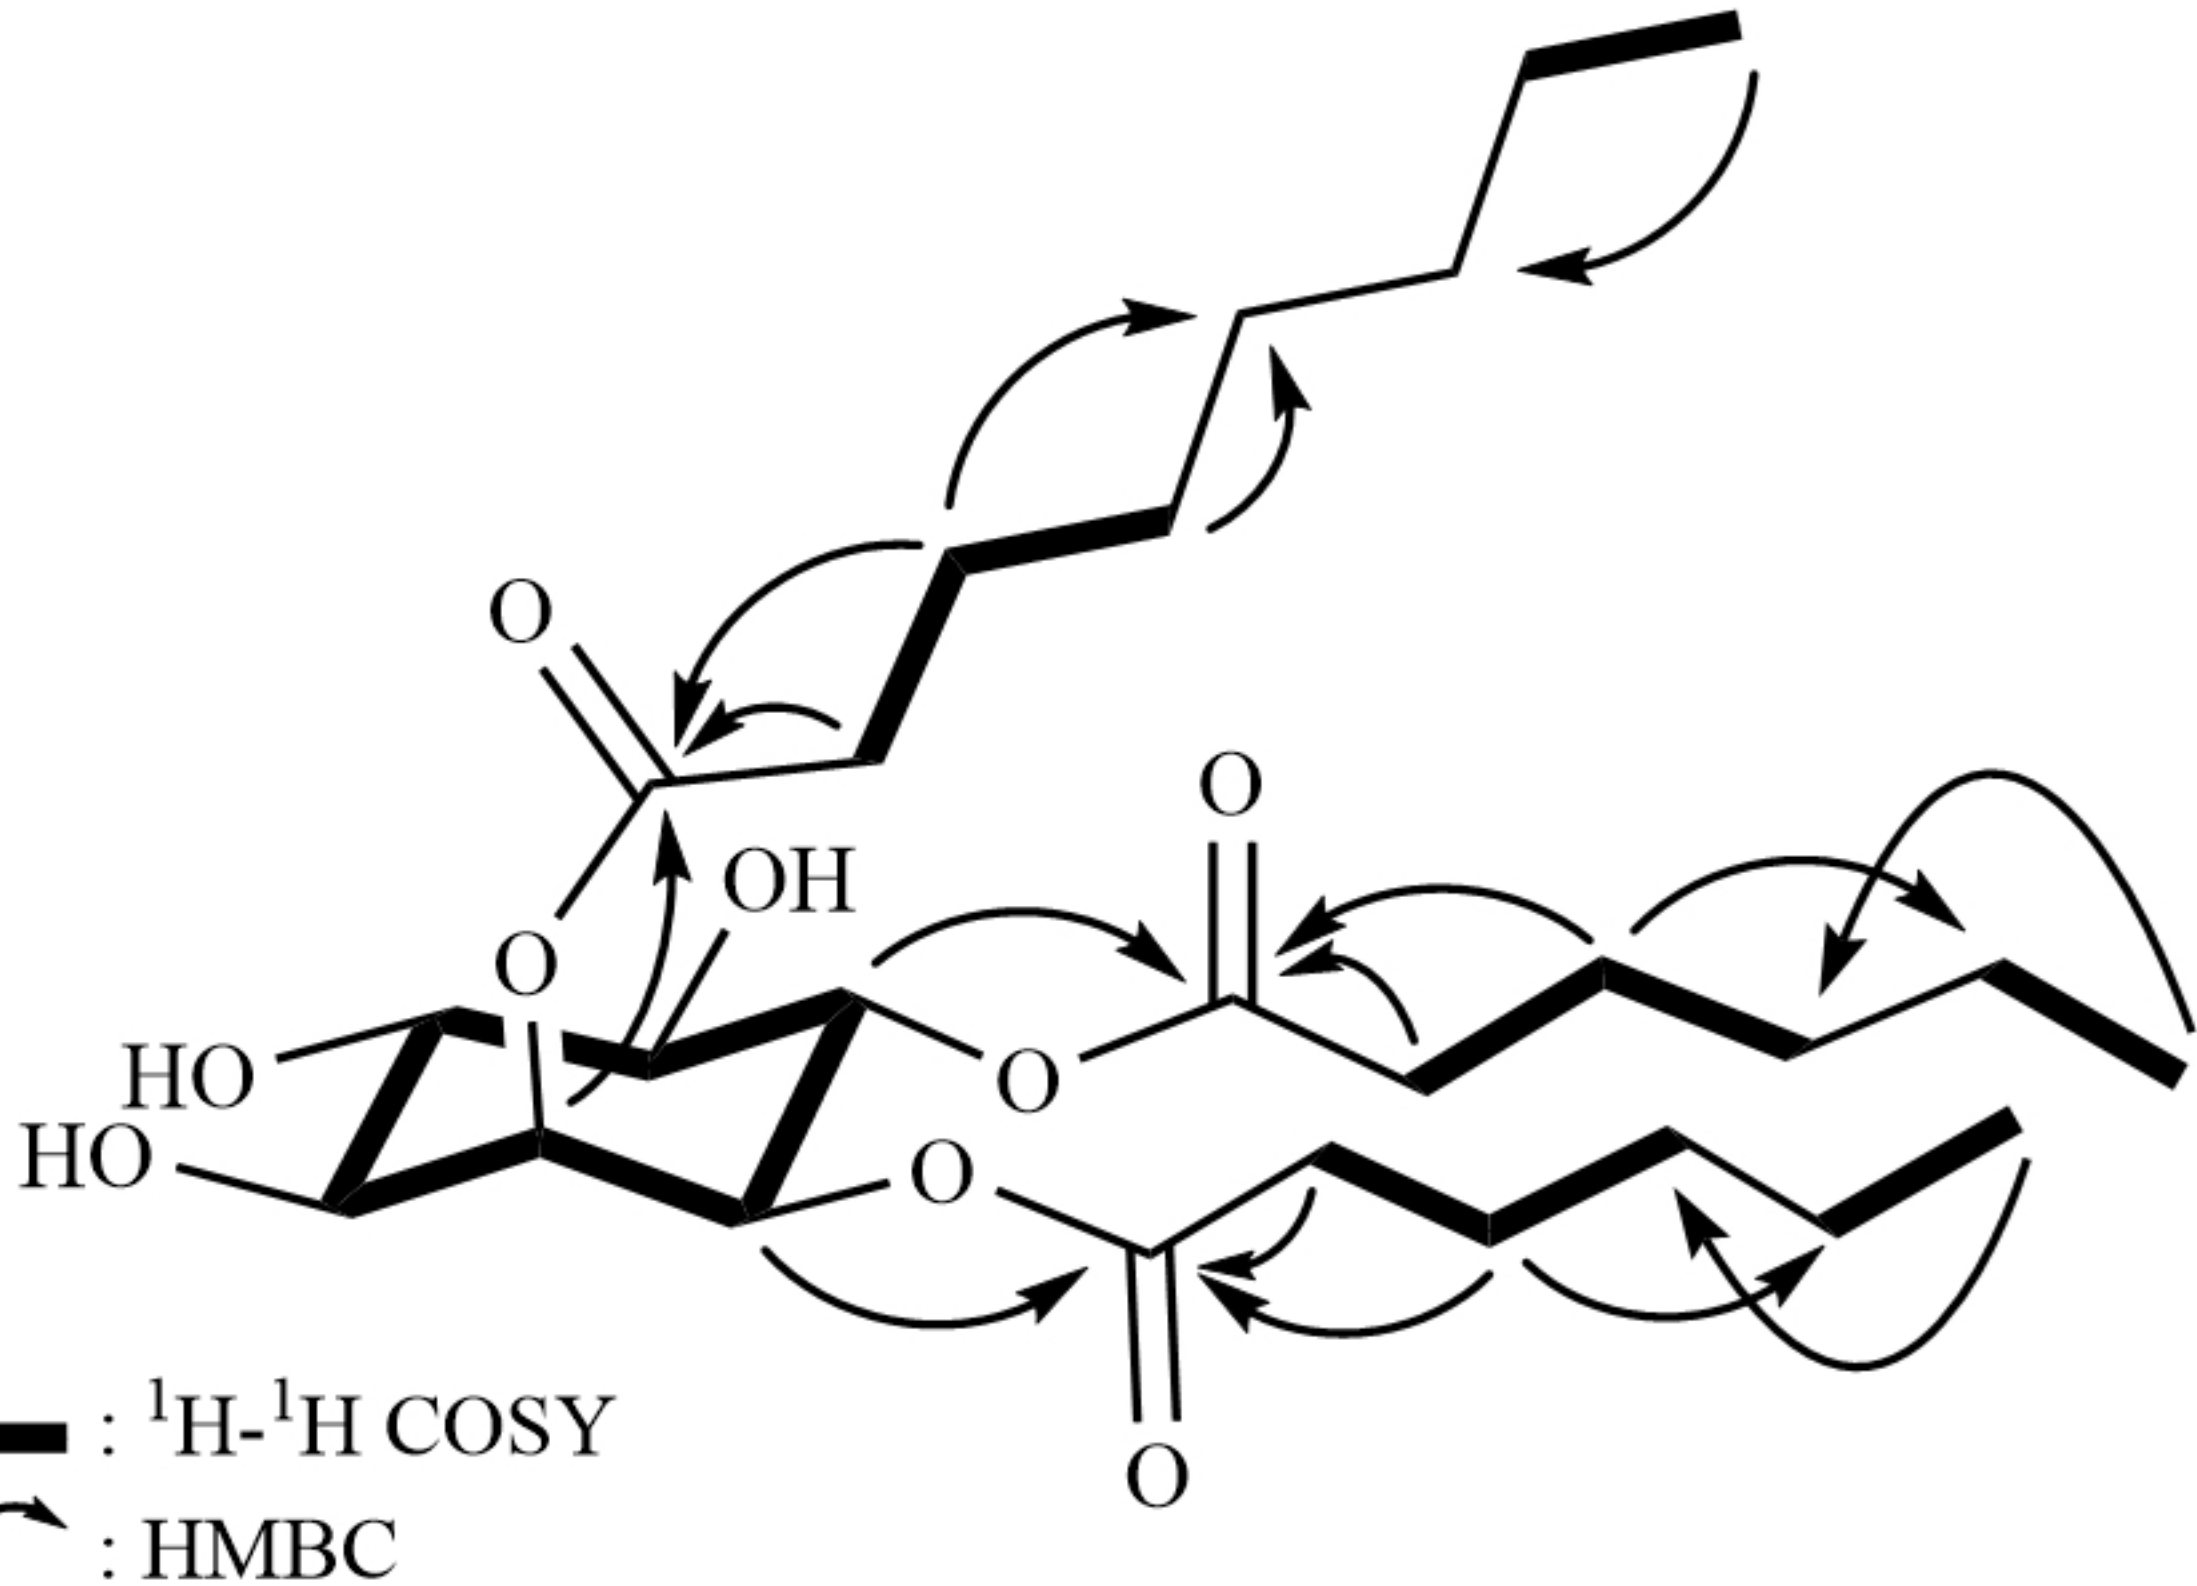

Fig6B
